# Supplementary material
Source: PubMed Central journal article supplement (PMC4503506)
Supplement: NIHMS688053-supplement-Supplemental_Material.pdf [file NIHMS688053-supplement-Supplemental_Material.pdf]

## SUPPLEMENTAL MATERIAL

### CD11c<sup>+</sup> DCs accelerate the rejection of older cardiac transplants via IL-17A

Rupert Oberhuber, MD<sup>1,2\*</sup>; Timm Heinbokel, MD<sup>1,3\*</sup>; Hector Rodriguez Cetina Biefer, MD<sup>1,4\*</sup>; Olaf Boenisch, MD<sup>5,6\*</sup>; Karin Hock, MD<sup>1,7</sup>; Roderick T. Bronson, DVM<sup>8</sup>; Markus J. Wilhelm, MD<sup>4</sup>; Yoichiro Iwakura, DSc<sup>9</sup>; Karoline Edtinger, MD<sup>1</sup>; Hirofumi Uehara, MD<sup>1</sup>; Markus Quante, MD<sup>1,10</sup>; Floris Voskuil<sup>1</sup>; Felix Krenzien, MD<sup>1,10</sup>; Bendix Slegtenhorst, MD<sup>1,11</sup>; Reza Abdi, MD<sup>5</sup>; Johann Pratschke, MD<sup>12</sup> and Abdallah Elkhail, PhD<sup>1</sup> & Stefan G. Tullius, MD, PhD<sup>1</sup>

**Short Title:** Aged DCs augment cardiac allograft rejection

<sup>1</sup>Transplantation Surgery Research Laboratory, Brigham and Women's Hospital, Harvard Medical School, Boston, MA 02115, USA

<sup>2</sup>Department of Visceral, Transplant and Thoracic Surgery, Center for Operative Medicine, Innsbruck Medical University, Innsbruck 6020, Austria

<sup>3</sup>Institute of Medical Immunology, Charité – Universitätsmedizin Berlin, Berlin 10117, Germany

<sup>4</sup>Clinic for Cardiovascular Surgery, University Hospital Zurich, Zurich 8091, Switzerland

<sup>5</sup>Transplantation Research Center, Brigham and Women's Hospital and Children's Hospital Boston, Harvard Medical School, Boston, MA 02115, USA

<sup>6</sup>Department of Intensive Care Medicine, University Medical Center Hamburg-Eppendorf, Hamburg 20246, Germany

<sup>7</sup>Division of Transplantation, Department of Surgery, Medical University of Vienna, Vienna 1090, Austria

<sup>8</sup>Rodent Histopathology Core, Harvard Medical School, Boston, MA 02115, USA

<sup>9</sup>Research Institute for Biomedical Sciences, Tokyo University of Science, Noda, Chiba 278-0022, Japan

<sup>10</sup>Department of Visceral, Transplantation, Thoracic and Vascular Surgery, University Hospital of Leipzig, Leipzig 04103, Germany

<sup>11</sup>Division of Transplant Surgery, Department of Surgery, Erasmus MC-University Medical Center, Rotterdam 3015, The Netherlands

<sup>12</sup>Department for General, Visceral, Transplant, Vascular and Thorax Surgery, Charité-Universitätsmedizin Berlin, Berlin 10117, Germany

\* R.O., T.H., H.R.C.B., and O.B. contributed equally to this work and are co-first authors.

Correspondence and requests for materials should be addressed to:  
Stefan G. Tullius, MD, Ph.D., FACS  
Brigham & Women's Hospital/Harvard Medical School  
75 Francist St.  
Boston, MA 02115  
email: [stullius@partners.org](mailto:stullius@partners.org)  
phone: 617-732-6446

CV Surgery: [37] transplantation, ventricular assistance, cardiomyopathy  
Basic Science Research: [130] animal models of human disease

## **SUPPLEMENTAL METHODS**

### ***Histology, immunohistochemistry and quantification***

At day 7 animals were sacrificed and cardiac allografts were procured. Samples were fixed in 10% formalin and embedded in paraffin. Coronary sections were then stained with hematoxylin/eosin (Sigma-Aldrich, St. Louis, MO), and analyzed by light microscopy. The degree of rejection was determined according to a score system based on the degree of inflammatory infiltration and myocyte damage (0=no rejection to 4=severe rejection) according to the International Society of Heart and Lung Transplantation (ISHLT) rejection score<sup>11,12</sup>. An independent pathologist (R.B.) analyzed all sections in a blinded fashion. Immunohistochemistry was performed in paraffin-embedded tissue sections with an automated immunostainer (Nexes; Ventana, Tucson, Arizona, USA), applying the streptavidin–biotin–peroxidase technique with diaminobenzidine as chromogen. Rat anti-mouse CD4 mAb (BD Biosciences, San Diego, CA), as well as rat anti-mouse CD8 mAb (BD Biosciences, San Diego, CA) were used as primary antibodies. For antigen retrieval heat pretreatment in an autoclave at 121°C for 5 minutes with citrate buffer (pH 6.0) was performed. Positive cells in 5 randomly selected high power fields were counted (HPF; 400 magnification). Data are given as mean ± SEM. An independent pathologist analyzed all sections in a blinded fashion. Immunohistochemistry for CD11c<sup>+</sup> DCs was performed using OCT-embedded, 4µm acetone-fixed mouse tissue sections. Slides were pre-treated with Peroxidase Block (DAKO USA, Carpinteria, CA) for 5 minutes to quench endogenous peroxidase activity. Monoclonal hamster anti-murine CD11c<sup>+</sup> (BD Biosciences, San Diego, CA) was applied in DAKO diluent at 1:200 for 1 hour. After washing, rabbit anti-rat immunoglobulin antibody was applied at 1:750 for 1 hour. Slides were then washed in 50-mM Tris-Cl, pH 7.4 and analyzed with anti-rabbit Envision+ kit (DAKO) per manufacturer's instructions. After further washing, immunoperoxidase staining was developed using a DAB chromogen (DAKO) prior to counterstaining with hematoxylin.

### ***Cell culture, cell proliferation assays***

Isolated naïve CD4<sup>+</sup> T cells ( $0.3 \times 10^6$  cells per well) were co-cultured with isolated CD11c<sup>+</sup> DCs ( $0.06 \times 10^6$  cells per well; ratio 5:1) in 48-well flat bottom plates in 0.5ml of complete RPMI 1640

media supplemented with 10% FCS, 200mM L-glutamine, 100U/ml penicillin/streptomycin and  $5 \times 10^5$  M 2-mercaptoethanol (RP-10) in presence of 10 $\mu$ g/ml plate-bound anti-mouse  $\alpha$ -CD3 (17A2) and 2 $\mu$ g/ml soluble  $\alpha$ -CD28 (37.51). LPS (Sigma-Aldrich) was diluted in PBS and added at a concentration of 1 $\mu$ g/ml. Where indicated, cells were cultured in Th17-polarizing conditions (10ng/ml of recombinant TGF $\beta$ , 100ng/ml of recombinant IL-6, 10mg/ml of anti-IFN $\gamma$ , and 10mg/ml of anti-IL4). All recombinant cytokines and antibodies were purchased from eBioscience except recombinant TGF $\beta$  (R&D Systems, Minneapolis, MN). After 7 days of culture supernatants and cells were collected and analyzed by ELISA and flow cytometry, respectively.

For cell proliferation assays,  $0.5 \times 10^6$  splenocytes from transplanted DBA/2J mice were co-cultured with irradiated donor-type splenocytes from naïve C57BL/6 mice in 96-well round bottom cell culture plates. After 72 hours, cells were pulsed with  $^3\text{H}$  thymidine (1 $\mu$ Ci/ well) and incubated for another 12 hours. Incorporation of  $^3\text{H}$  thymidine indicating cell proliferation was then assessed as counts/min, using a Wallac Liquid Scintillation Counter (PerkinElmer Inc., Boston, MA, USA).

To test immunogenic properties of old versus young dendritic cells *in vitro*,  $1 \times 10^6$  splenocytes from naïve DBA/2J mice were co-cultured with  $10^4$  splenic CD11c $^+$  DCs from young or old naïve B6 mice with no LPS-stimulation, with low LPS-stimulation (10ng/ml) or with high LPS-stimulation (100ng/ml) in 96-well round bottom cell culture plates and further processed as described above.

### ***Flow Cytometry***

Fluorescence labeled anti-mouse  $\alpha$ -CD4 (GK1.5),  $\alpha$ -CD8 (53-6.7),  $\alpha$ -CD25 (PC61),  $\alpha$ -CD11c (HL3),  $\alpha$ -CD40 (3/23),  $\alpha$ -CD44 (IM7),  $\alpha$ -CD62L (MEL-14),  $\alpha$ -CD80 (16-10A1),  $\alpha$ -CD86 (GL1),  $\alpha$ -IA $^b$  (AF6-120.1) antibodies were obtained from BD Biosciences (San Jose, CA, USA). Fluorescence labeled anti-mouse  $\alpha$ -Foxp3 (150D/E4),  $\alpha$ -IFN $\gamma$  (XMG1.2) and  $\alpha$ -IL-17A (eBio17B7) were purchased from eBioscience (San Diego, CA, USA). For compensation and gate setting, permeabilized and unpermeabilized unstained cells were used. Intracellular staining for Foxp3, IFN $\gamma$  and IL-17A was performed according to manufacturer's protocols. Cells were re-stimulated in complete media (RPMI media containing 10% FCS, 1% L-Glutamine, 1% Penicillin/Streptomycin; all Bio Whittaker,

Walkersville, MD) for 4 hours at 37°C with ionomycin, phorbol 12-myristate 13-acetate and Brefelding A (eBioscience). Cells were fixed and permeabilized using Cytfix/Cytoperm solution (BD Biosciences). Flow cytometry measurements were performed using a FACSCalibur system (BD), and data were analyzed using FlowJo (Tree Star, Ashland, OR, USA).

### ***RNA extraction and real-time PCR***

RNA extraction from cardiac allografts was performed using RNAqueous extraction kit according to the manufacturer's protocol (Applied Biosystems, Carlsbad, CA, USA). Briefly, 1 mg of heart tissue was homogenized in lysis buffer (total volume of 0.5 ml) and passed through a column. After successive washes, RNA was eluted and reverse transcription was performed using i-Script® cDNA synthesis kit (Bio-Rad Laboratories, Hercules, CA, USA). For real-time PCR reactions *IL-17A* (MM5419) measurements were performed with Taqman primers and probes from Applied Biosystems. Relative gene expression was determined using the housekeeping gene *GAPDH* (MM99999915\_g1) as control.

## SUPPLEMENTAL FIGURES AND LEGENDS

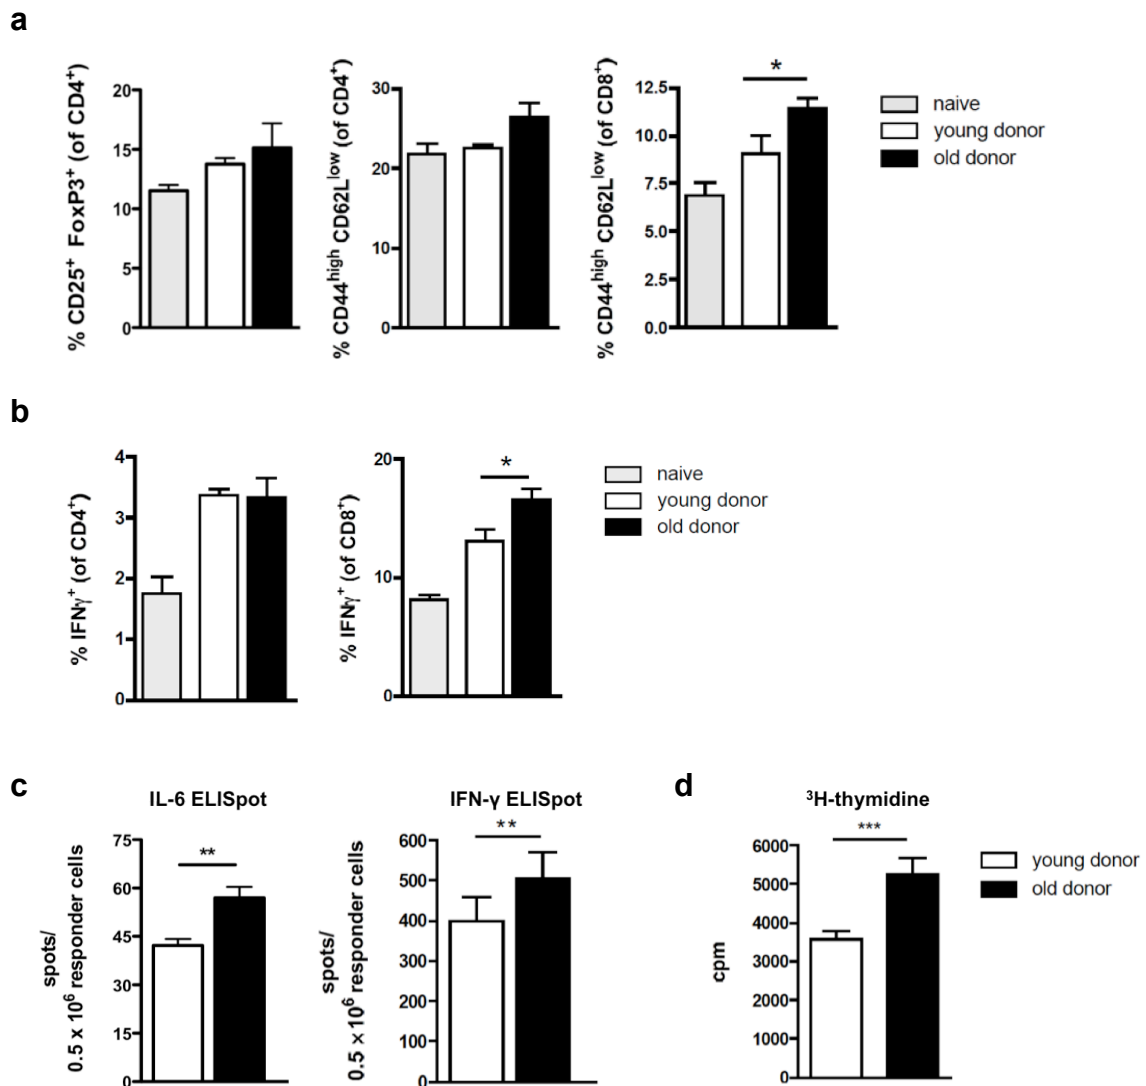

### Supplemental Figure 1. Older cardiac allografts elicit more potent systemic alloimmune

**responses.** Hearts from old and young C57BL/6 mice were transplanted into young DBA/2J mice; 7 days after transplantation, mice were euthanized and splenocytes were analyzed by flow cytometry for **a**, frequencies of CD4<sup>+</sup>CD25<sup>+</sup>FoxP3<sup>+</sup> Tregs and CD4<sup>+</sup>/CD8<sup>+</sup> effector cells (CD44<sup>high</sup> CD62L<sup>low</sup>) (n=4/group; \*P<0.05) and **b**, frequencies of CD4<sup>+</sup>IFN $\gamma$ <sup>+</sup> and CD8<sup>+</sup>IFN $\gamma$ <sup>+</sup> T cells (n=4/group; \*P<0.05). **c-d**, Splenocytes from young DBA/2J mice were co-cultured with irradiated donor-type splenocytes from old or young C57BL/6 mice and (**c**), frequencies of splenocytes producing IL-6 and IFN $\gamma$  and (**d**) proliferation rates were analyzed by ELISpot and <sup>3</sup>H-thymidine incorporation, respectively (n=4/group; \*\*P<0.01; \*\*\*P<0.001; data are representative of three independent sets of experiments).

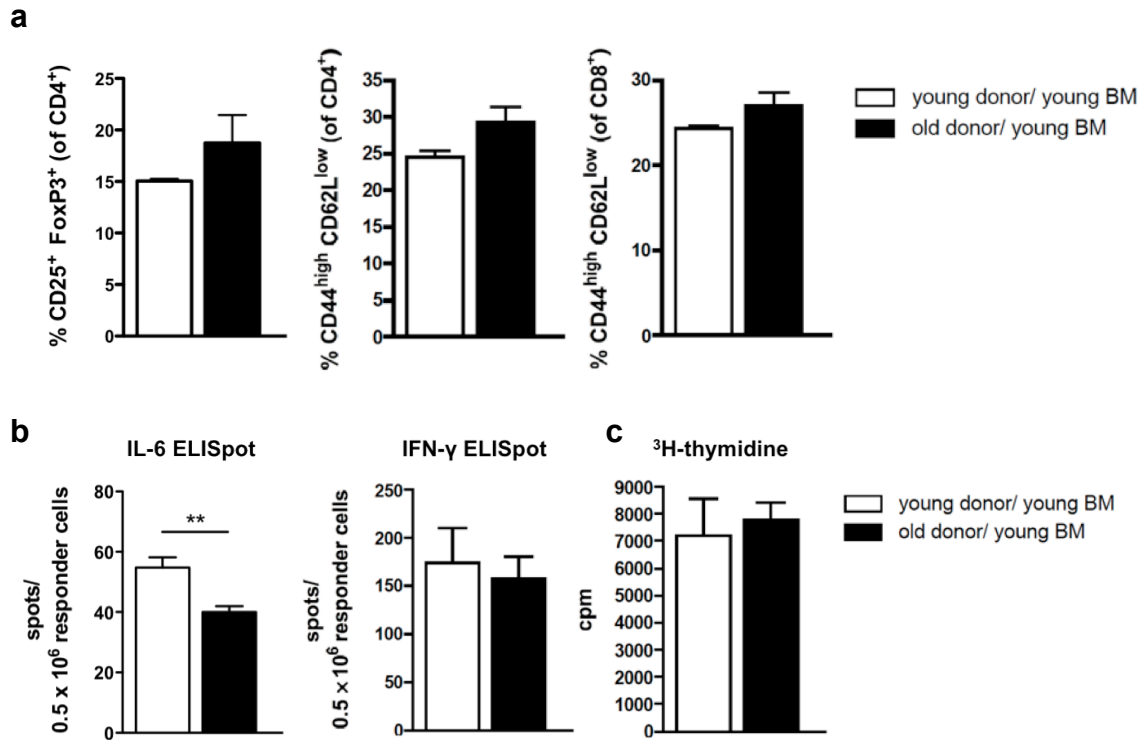

**Supplemental Figure 2. Systemic immune responses were comparable after the transplantation of chimeric young and old hearts.** 24 hours after irradiation, bone marrow transplantation from young syngeneic C57BL/6 mice was performed to reconstitute passenger leukocytes within donor hearts. 7 days after transplantation, mice were euthanized and splenocytes were analyzed by flow cytometry for **a**, frequencies of CD4<sup>+</sup>CD25<sup>+</sup>Foxp3<sup>+</sup> Tregs and CD4<sup>+</sup>/CD8<sup>+</sup> effector T cells (CD44<sup>high</sup>CD62L<sup>low</sup>) (n=4/group; NS, non-significant). **b-c**, Splenocytes from young DBA/2J mice were co-cultured with splenocytes from old or young chimeric C57BL/6 mice and (**b**) frequencies of splenocytes producing IL-6 and IFN $\gamma$  and (**c**) proliferation rates were analyzed by ELISpot and <sup>3</sup>H-thymidine incorporation, respectively (n=4/group; \*\*P<0.01; data are representative of three independent sets of experiments).

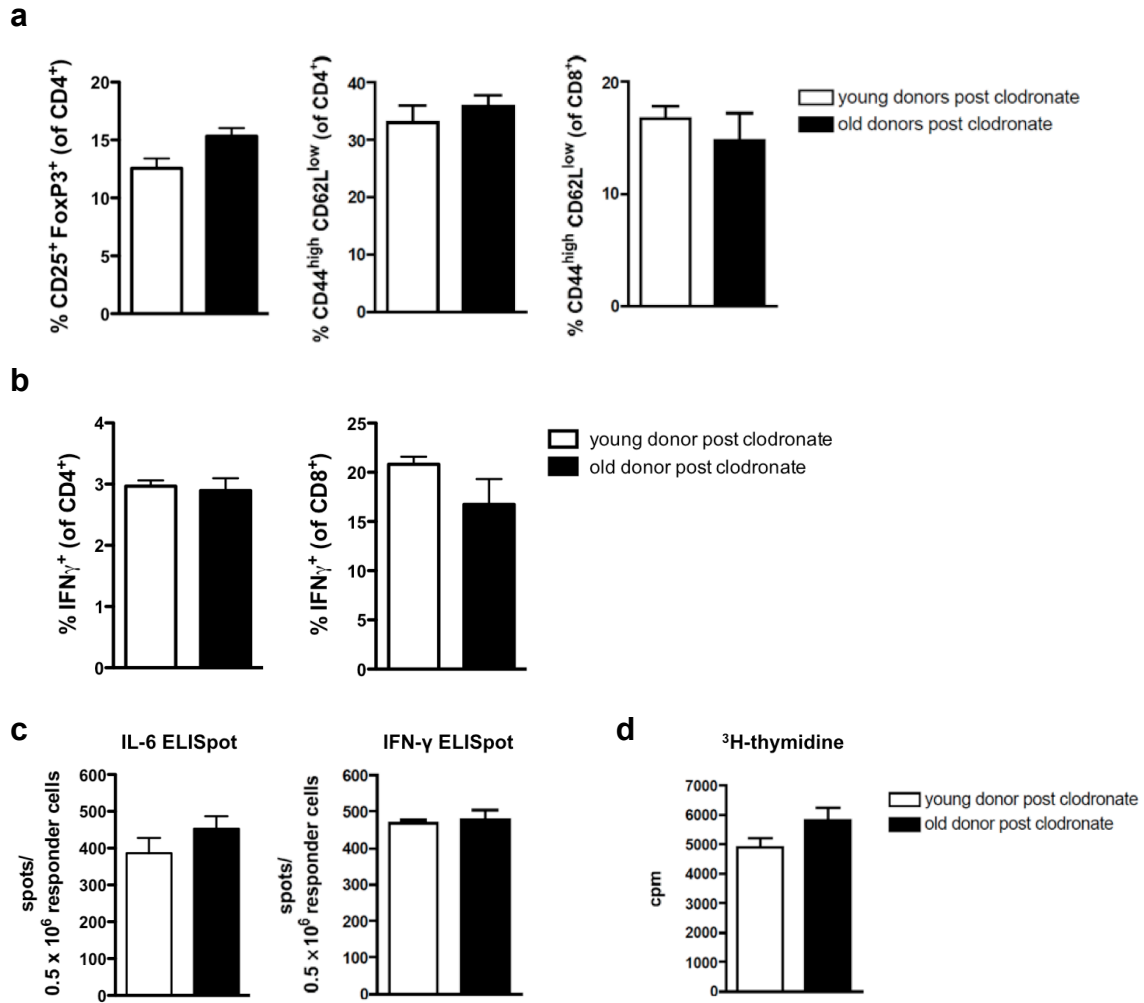

**Supplemental Figure 3. Systemic alloimmune responses to grafts procured from donors pretreated with clodronate were age-independent.** DC-depleted hearts from old and young C57BL/6 mice were transplanted into young DBA/2J mice; 7 days after transplantation, mice were euthanized and splenocytes were analyzed by flow cytometry for **(a)** frequencies of CD4<sup>+</sup>CD25<sup>+</sup>FoxP3<sup>+</sup> Tregs and CD4<sup>+</sup>/CD8<sup>+</sup> effector T cells (CD44<sup>high</sup> CD62L<sup>low</sup>) (n=4/group; NS, non-significant) and **(b)** for frequencies of CD4<sup>+</sup>IFN $\gamma$ <sup>+</sup> and CD8<sup>+</sup>IFN $\gamma$ <sup>+</sup> T cells (n=4/group; NS, non-significant). **c-d**, Splenocytes from young DBA/2J mice were co-cultured with splenocytes from DC-depleted old or young C57BL/6 mice and **(c)**, frequencies of splenocytes producing IL-6 and IFN $\gamma$  and **(d)** proliferation rates were analyzed by ELISpot and <sup>3</sup>H-thymidine incorporation, respectively (n=4/group; NS, non-significant, data are representative of three independent sets of experiments).
